# Supplementary material
Source: PubMed Central journal article supplement (PMC4081048)
Supplement: bi401263h_si_001.pdf [file bi401263h_si_001.pdf]

## Supplementary Information

### Supplementary figure legends

**Supplementary Figure 1.  $\Delta$ F508 CFTR exhibits less functional decline at the plasma membrane in the presence of VX-809.** Bar-graphs representing maximal short-circuit currents (maximum increase from the baseline value) for the data points corresponding to 0 h, 2 h and 4 h of incubation at 37°C following temperature rescue of (A)  $\Delta$ F508 CFTR and (B)  $\Delta$ F508 CFTR His 10 at the plasma membrane at 37°C in CFBEo<sup>-</sup> cells pretreated with DMSO or VX-809 (5  $\mu$ M, 48 h). Data at each time-point is represented relative to the function at 0 h. Data represents means of three to four independent experiments.  $\Delta$ F508 CFTR retained more function in the presence of VX-809 compared to DMSO which was found to be statistically significant (\*\* $p < 0.01$ ). However, no such statistical significance (ns) was observed for the functional profile of  $\Delta$ F508 CFTR His 10 with and without VX-809.

### **Supplementary Figure 2. VX-809 increases surface levels of $\Delta$ F508 CFTR and $\Delta$ F508 CFTR His 10 molecules**

Surface expression of Flag-tagged WT,  $\Delta$ F508 CFTR and  $\Delta$ F508 CFTR His 10 molecules in HEK-293 cells detected using HRP-based ELISA. Surface levels of  $\Delta$ F508 CFTR are enhanced in the presence of VX-809; \* $p < 0.05$ , \*\* $p < 0.01$ .

### **Supplementary Figure 3. VX-809 potentiates $\Delta$ F508 CFTR function in HEK 293 cells**

Representative line graph to show iodide efflux measurements depicting CFTR function in HEK-293 cells. VX-809 potentiates function of Flag- $\Delta$ F508 CFTR maintained at 37°C or in the temperature rescue condition. Bar-graph represents the maximal increase in iodide efflux rate

(maximum increase from the baseline value). Par refers to the cells that express no CFTR. Data represents mean of three experiments;  $**p < 0.01$ .

#### **Supplementary Figure 4. VX-809 potentiates $\Delta F508$ CFTR function in CFBEo<sup>-</sup> cells**

Representative traces of short-circuit current showing  $\Delta F508$  CFTR function in CFBEo<sup>-</sup> cells pretreated with DMSO or VX-809 and maintained at (A) 37°C and (B) in the temperature rescue condition (28°C). Bar-graph shows the maximal increase in short-circuit currents (maximum increase from the baseline value). Cocktail refers to the mix of cAMP-elevating reagents composed of 10  $\mu\text{M}$  Fsk and 100  $\mu\text{M}$  IBMX added to the apical side of the cells. Data represents mean of three experiments;  $*p < 0.05$ .

#### **Supplementary Figure 5. Luminal secretions in the intestinal organoids are CFTR-mediated**

Representative images of the intestinal organoids depicting extent of luminal secretions in response to various reagents [(DMSO/Fsk (10  $\mu\text{M}$ )/Fsk (10  $\mu\text{M}$ ) + CFTR<sub>inh</sub>-172 (50  $\mu\text{M}$ )] after 30 min of treatment. Bar-graph represents change in the luminal secretions at 30 min from the base-line values at 0 min (images not shown). Data represents mean of three experiments;  $**p < 0.01$ , ns=non-significant.

A

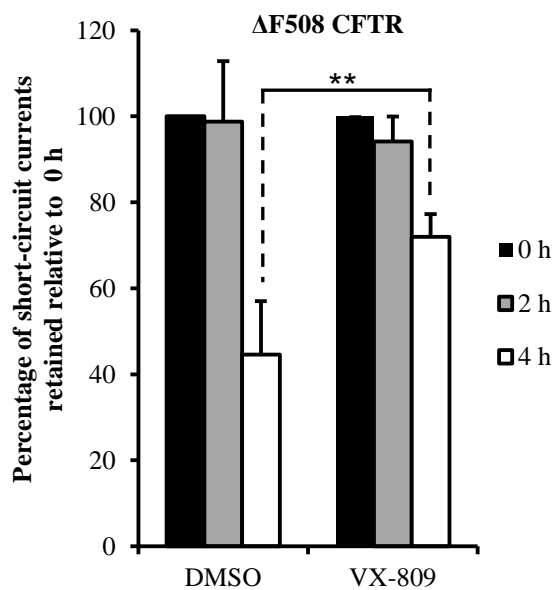

B

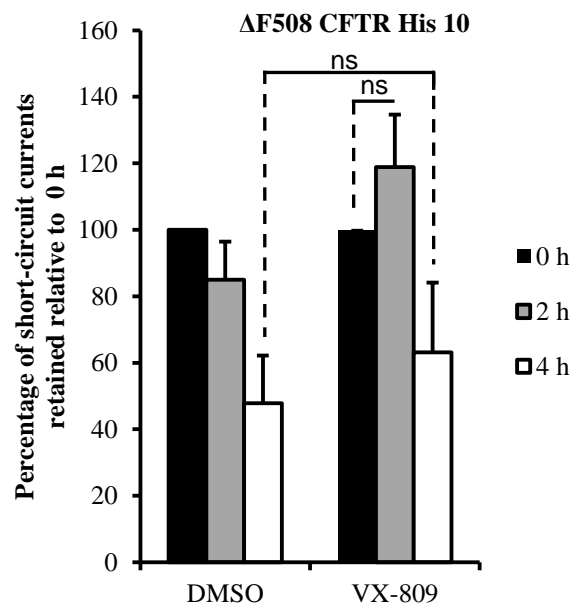

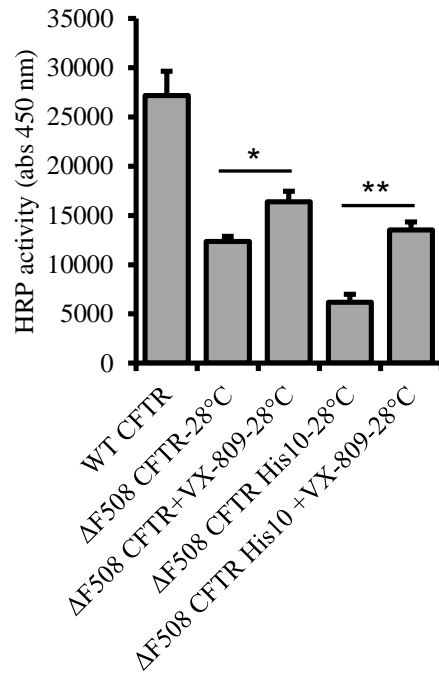

Supplementary figure 2

**A**

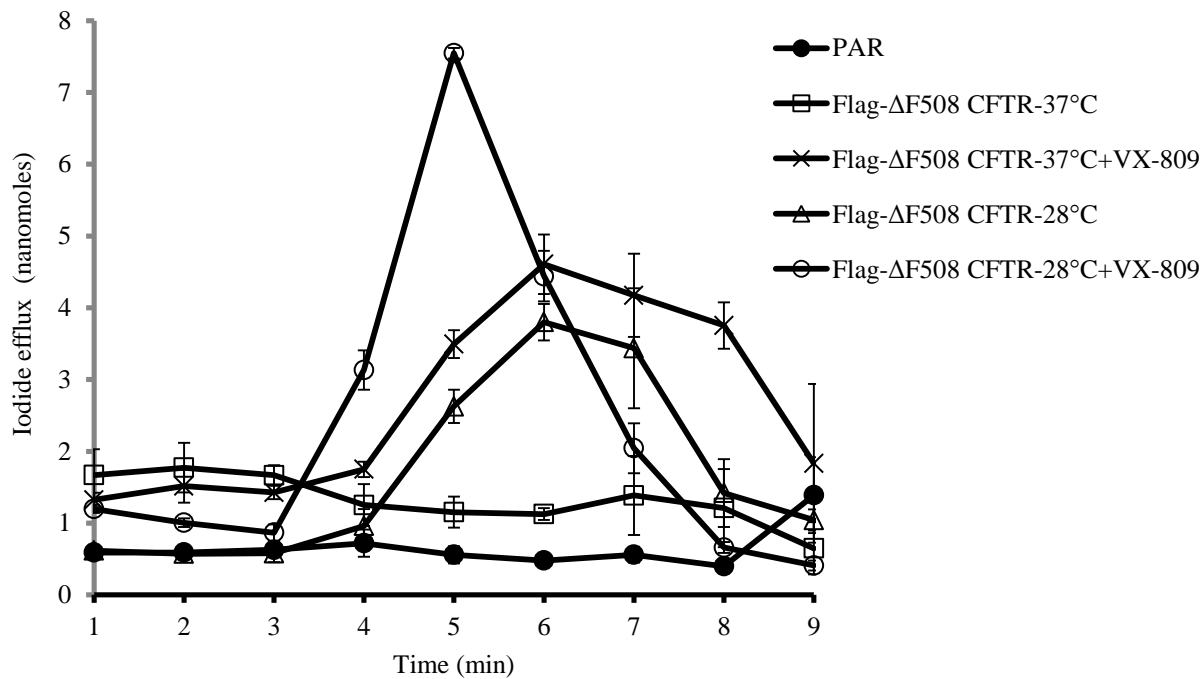

**B**

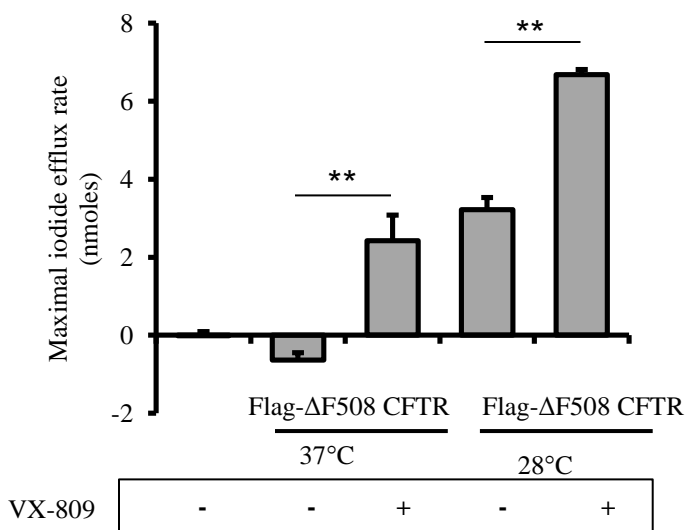

Supplementary figure 3

A

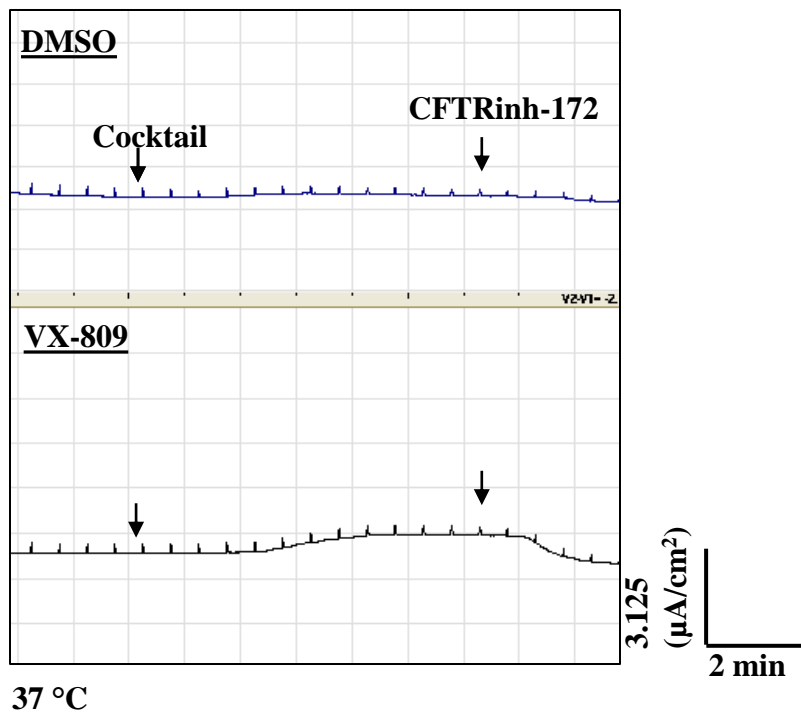

B

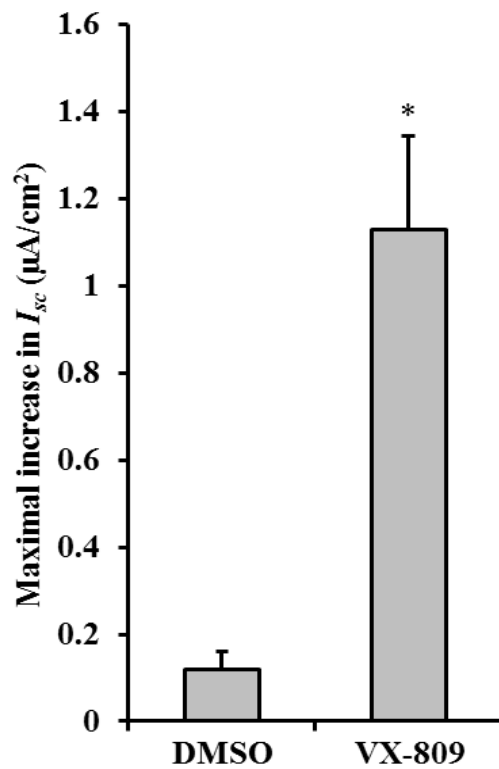

C

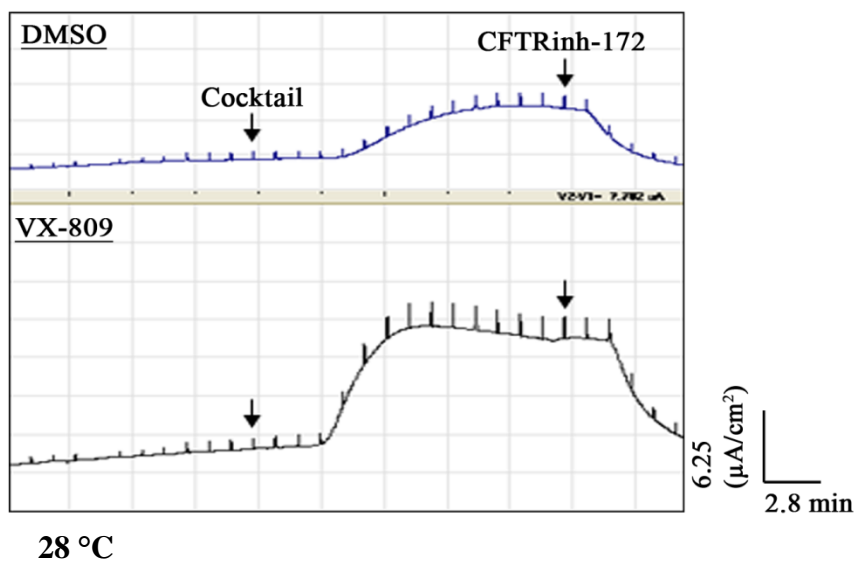

D

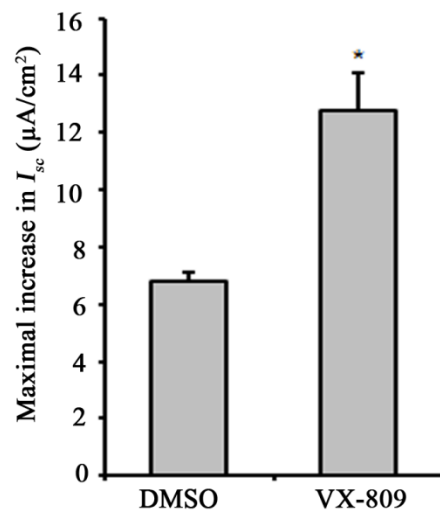

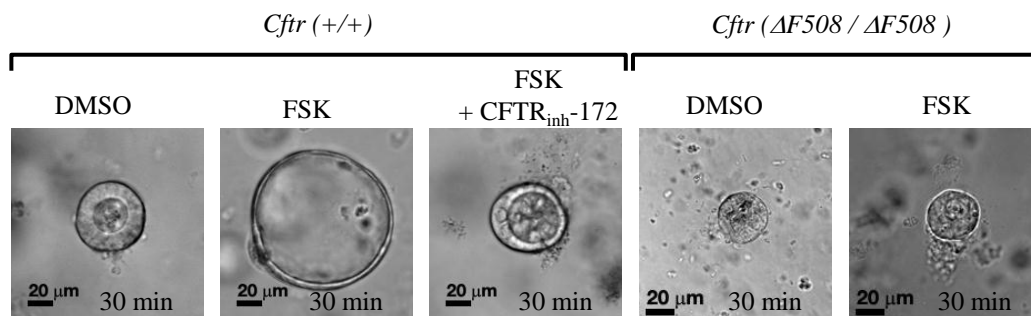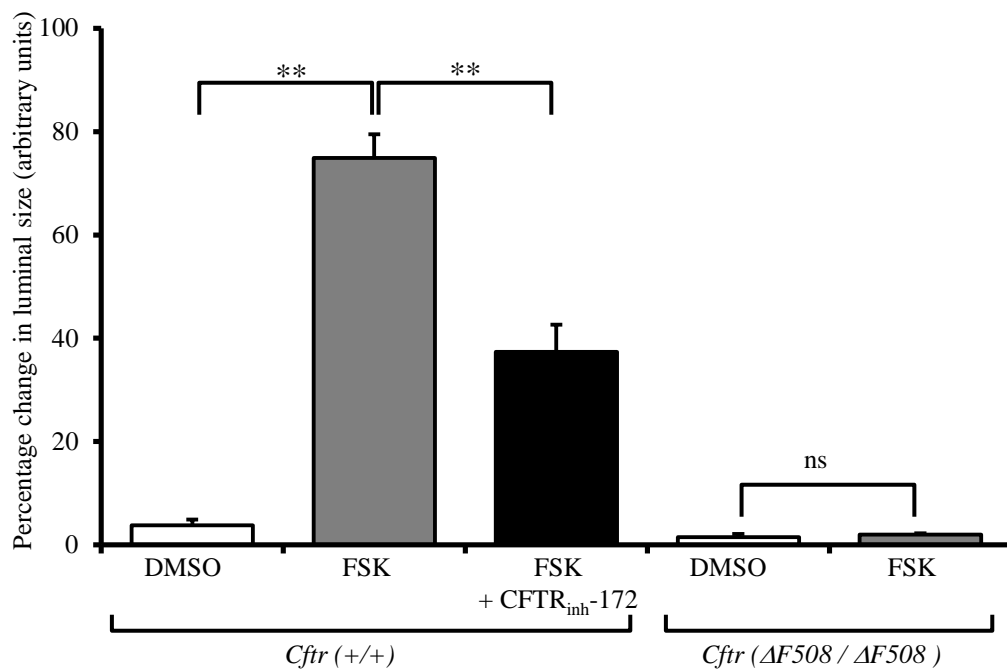

Supplementary figure 5
